# Supplementary material
Source: PubMed Central journal article supplement (PMC7534584)
Supplement: NIHMS1632601-supplement-supplement.pdf [file NIHMS1632601-supplement-supplement.pdf]

**Figure S1.** Restricted cubic spline plots of log hazard ratio of arteriovenous fistula (AVF) outcomes versus age with 3 knots at 10th, 50th, and 90th percentile. A restricted cubic spline is a cubic spline in which the splines are constrained to be linear in the two tails. Break points in the linearity are changes in slope for the log hazard ratio function. The dotted curves represent the 95% confidence intervals. (A) AVF placement in 3 years after dialysis initiation; (B) AVF maturation in 2 years after placement; (C) AVF primary patency loss in 2 years after maturation; (D) AVF abandonment in 2 years after maturation.

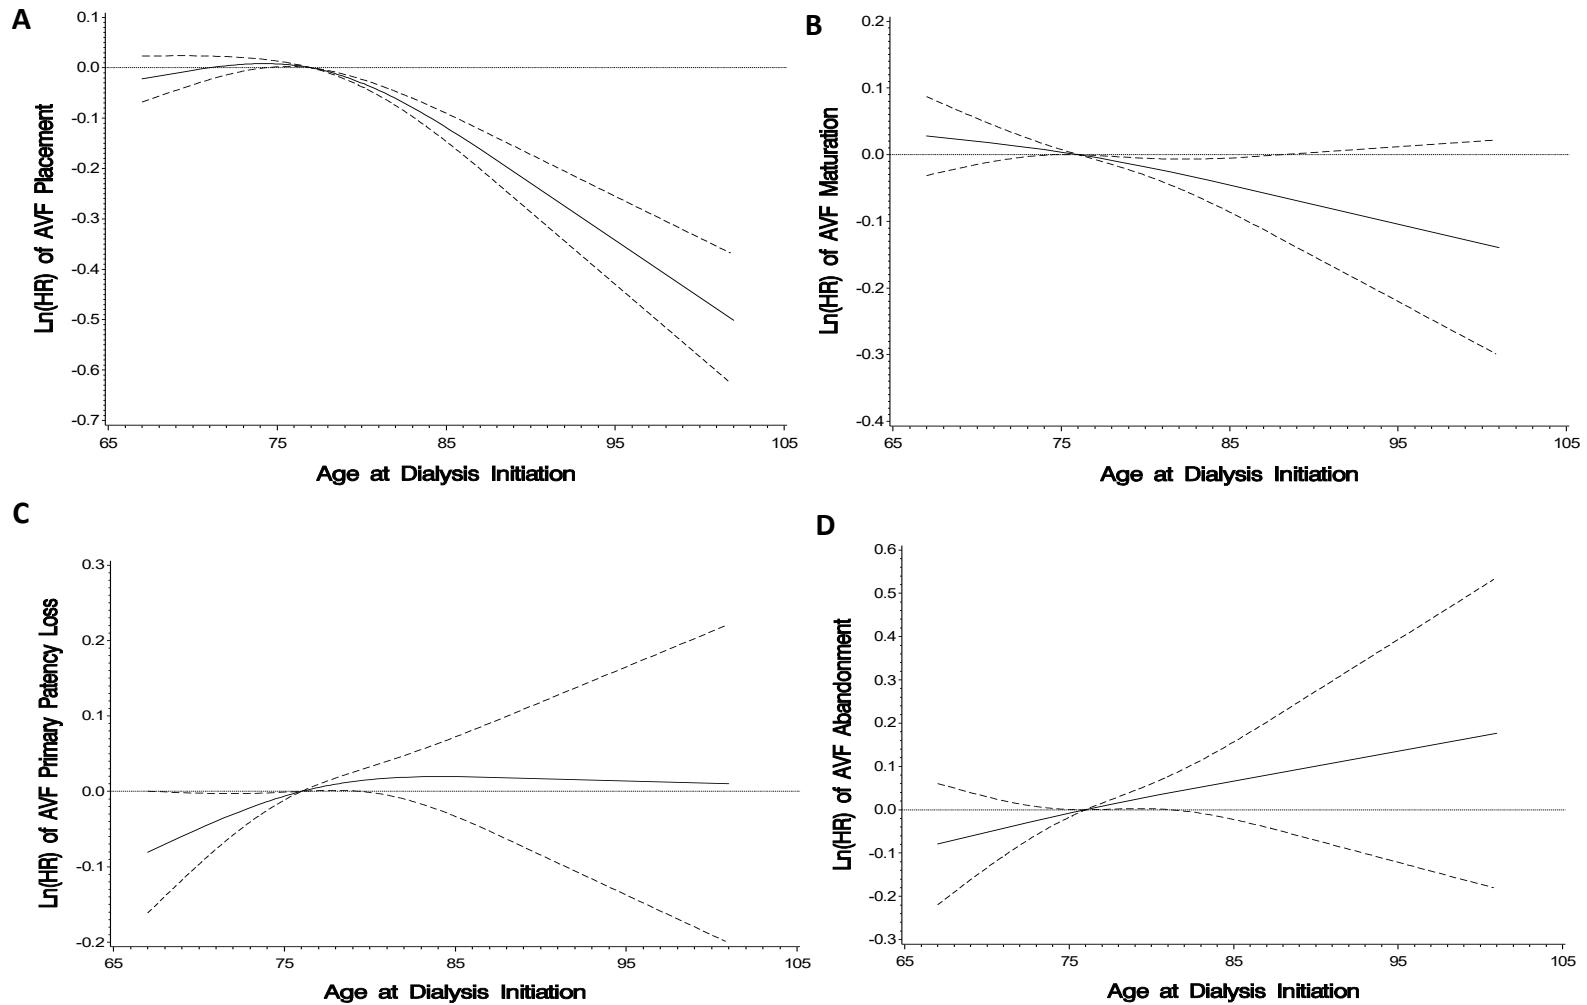

**Table S1. Codes of surgical and endovascular procedures associated with hemodialysis arteriovenous fistula (AVF) management.**

| <b>Type of intervention</b>                                                                           | <b>Codes</b>                                      |
|-------------------------------------------------------------------------------------------------------|---------------------------------------------------|
| <b>Open surgical procedures</b>                                                                       | <b>CPT-4 Codes</b>                                |
| Revision, open, arteriovenous fistula; with thrombectomy, autogenous or nonautogenous dialysis graft  | 36833                                             |
| Revision of fistula or graft                                                                          | 36832                                             |
| Fistula elevation or superficialization                                                               | 36832                                             |
| Ligation of accessory veins                                                                           | 36832                                             |
| Open surgical procedures for treatment of steal syndrome                                              | 36832                                             |
| Open repair of pseudoaneurysm                                                                         | 36832                                             |
| Banding fistula or graft                                                                              | 36832                                             |
| Open thrombectomy, arteriovenous fistula without revision, autogenous or nonautogenous dialysis graft | 36831                                             |
|                                                                                                       |                                                   |
| <b>Endovascular interventions</b>                                                                     | <b>CPT-4 Codes</b>                                |
| Angiogram with venous angioplasty                                                                     | 36147, 35476, 75978                               |
| Angiogram with arterial angioplasty                                                                   | 36147, 35475, 75962                               |
| Angiogram with venous angioplasty and stent                                                           | 36147, 37205, 37206 (rarely +37239)               |
| Angiography, arteriovenous shunt (e.g., dialysis patient fistula / graft)                             | 75791 (must be present with other interventions)  |
| Percutaneous thrombectomy                                                                             | 36870 (also 36147, 36148)                         |
| Percutaneous thrombectomy with venous angioplasty                                                     | 36870, 36147, 36148, 35476, 75978                 |
| Percutaneous thrombectomy with arterial angioplasty                                                   | 36870, 36147, 36148, 35475, 75962                 |
| Percutaneous thrombectomy with venous angioplasty and stent                                           | 36870, 36147, 36148, 37205, 37206 (rarely +37239) |
|                                                                                                       |                                                   |
| <b>Inpatient procedures</b>                                                                           | <b>ICD-9 Codes</b>                                |
| Compression of vein                                                                                   | 459.2                                             |
| Mechanical complications of vascular device, implant and graft                                        | 996.1                                             |
| Other complication of vascular device, implant and graft                                              | 996.7                                             |

**Table S2. Odds ratios (ORs) and their associated 95% confidence intervals (CIs) of arteriovenous fistula (AVF) assisted maturation by age group in hemodialysis patients aged 67 and older.**

|                                   | AVF Assisted Maturation |                      |
|-----------------------------------|-------------------------|----------------------|
|                                   | Unadjusted OR (95% CI)  | Adjusted OR (95% CI) |
| <b>Age at dialysis initiation</b> |                         |                      |
| 67-<77                            | 1                       | 1                    |
| ≥77                               | 1.23(1.15,1.31)         | 1.12(1.05,1.21)      |

Note: Adjusted by gender, race, diabetes, myocardial infarction, stroke, cardiovascular disease, functional status, facility type, comorbid score, BMI, eGFR, time of central venous catheter (CVC) dependency, and primary or secondary AVF.
